# Supplementary material
Source: publisher figshare collection journal article supplement (https://frontiersin.figshare.com/ndownloader/files/21931944)
Supplement: Supplementary file 1 [file 21931944]

Model selection of fixed effects for the Rh linear mixed effect model

The symbol * indicates that interactions between environmental variables are being tested, as well as the environmental variables being tested individually.

1) Original model.

Rh model 1<-lme(log(Rh)~Plantation*Microform*Soil moisture

+Plantation*Microform*Soil temperature

+Plantation*Microform*Air temperature

+Plantation*Microform*WTD,

random=~1|Plantation/Plot/Subplot,

correlation=corCompSymm(form=~1|Plantation/Plot/Subplot/Microform),

weights= varIdent(form=~1|Plantation*Microform))

2) The interaction between plantation and microform with WTD was dropped.

Rh model 2<-lme(log(Rh)~Plantation*Microform*Soil moisture

+Plantation*Microform*Soil temperature

+Plantation*Microform*Air temperature

+Plantation*WTD

+Microform*WTD,

random=~1|Plantation/Plot/Subplot,

correlation=corCompSymm(form=~1|Plantation/Plot/Subplot/Microform),

weights= varIdent(form=~1|Plantation*Microform))

3) The interaction between microform and WTD was dropped.

Rh model 3<-lme(log(Rh)~Plantation*Microform*Soil moisture

+Plantation*Microform*Soil temperature

+Plantation*Microform*Air temperature

+Plantation*WTD,

random=~1|Plantation/Plot/Subplot,

correlation=corCompSymm(form=~1|Plantation/Plot/Subplot/Microform),

weights= varIdent(form=~1|Plantation*Microform))

4) The interaction between plantation and microform with air temperature was dropped.

Rh model 4<-lme(log(Rh)~Plantation*Microform*Soil moisture

+Plantation*Microform*Soil temperature

+Plantation*Air temperature

+Microform*Air temperature

+Plantation*WTD,

random=~1|Plantation/Plot/Subplot,

correlation=corCompSymm(form=~1|Plantation/Plot/Subplot/Microform),

weights= varIdent(form=~1|Plantation*Microform))

5) The interaction between plantation and air temperature was dropped.

Rh model 5<-lme(log(Rh)~Plantation*Microform*Soil moisture

+Plantation*Microform*Soil temperature

+Microform*Air temperature

+Plantation*WTD,

random=~1|Plantation/Plot/Subplot,

correlation=corCompSymm(form=~1|Plantation/Plot/Subplot/Microform),

weights= varIdent(form=~1|Plantation*Microform))

6) The interaction between microform and air temperature was dropped. This is the final model.

Rh model 6<-lme(log(Rh)~Plantation*Microform*Soil moisture

+Plantation*Microform*Soil temperature

+Air temperature

+Plantation*WTD,

random=~1|Plantation/Plot/Subplot,

correlation=corCompSymm(form=~1|Plantation/Plot/Subplot/Microform),

weights= varIdent(form=~1|Plantation*Microform))
